# Supplementary material for: Do Pollinators Contribute to Nutritional Health?
Source: PLoS One. 2015 Jan 9;10(1):e114805. doi: 10.1371/journal.pone.0114805 (PMC4289064; doi:10.1371/journal.pone.0114805)
Supplement: S4 Table — Risk of nutrient deficiency estimates across nutrients, age groups, and countries. See the main text and ‘Methods’ in the main text for explanation of the absence of standard error for the proportion of the population below the EAR for iron. N is the sample size and does not include individuals with missing data for age categories. See ‘Methods’ for handling of missing data. (XLSX) [file pone.0114805.s007.xlsx]

## Sheet: Table S4
						Vitamin A								Calcium								Folate								Iron				Zinc
						N		Proportion Below EAR		Standard Error of Prop. Below EAR		P Value for Significant Difference		N		Proportion Below EAR		Standard Error of Prop. Below EAR		P Value for Significant Difference		N		Proportion Below EAR		Standard Error of Prop. Below EAR		P Value for Significant Difference		N		Prevalance		N		Proportion Below EAR		Standard Error of Prop. Below EAR		P Value for Significant Difference
Children	1<=Age<4 years		Bangladesh
				Full Pollination		500		0.91		0.03		0.29		500		0.9908		0.00589		0.47		500		0.9434		0.0209		0.32		500		0.41592		500		0.2858		0.0275		0.23
				No Pollination				0.93		0.027						0.9914		0.00567						0.9563		0.0183						0.44742				0.314		0.0266
			Mozambique
				Full Pollination		186		0.28		0.115		0.04		186		1		0		NA		186		0.1949		0.147		0.085		186		0.11371		186		0.01615		0.024		0.345
				No Pollination				0.84		0.296						1		0						0.4231		0.0721						0.161022				0.03186		0.0303
			Uganda
				Full Pollination		440		0.24		0.061		0.015		451		0.8255		0.0387		0.37		451		0.1672		0.0368		0.215		451		0.495787		451		0.05157		0.024		0.4
				No Pollination				0.39		0.037						0.844		0.0392						0.2077		0.0358						0.531242				0.06076		0.0266
			Zambia
				Full Pollination		295		0.02		0.039		0.265		295		0.982		0.0345		0.425		295		0.05038		0.0431		0.485		295		0.0140678		295		0.004744		0.00671		0.445
				No Pollination				0.07		0.069						0.9901		0.0255						0.04803		0.0531						0.0164746				0.006195		0.00789
Children	4<=Age<9 years		Bangladesh
				Full Pollination		31		1		0		-		31		1		0		NA		31		1		0		NA		31		0.481613		31		0.9457		0.16		0.45
				No Pollination				Usual intake distribution could not be estimated.								1		0						1		0						0.520323				0.9722		0.142
			Mozambique
				Full Pollination		0		-		-		-		0		-		-		-		0		-		-		-		0		-		0		-		-		0
				No Pollination
			Uganda
				Full Pollination		350		0.1474		0.172		0.275		364		0.9932		0.0341		0.475		364		0.09587		0.0423		0.255		364		0.243956		364		0.07054		0.0626		0.38
				No Pollination				0.2698		0.112						0.99		0.0337						0.135		0.0421						0.272143				0.09816		0.0647
			Zambia
				Full Pollination		151		0.1276		0.0627		0.02		151		0.995		0.00717		0.355		151		0.2379		0.0489		0.205		151		0.0601987		151		0.145		0.0458		0.39
				No Pollination				0.3073		0.0589						0.998		0.00348						0.2959		0.0507						0.0713245				0.1634		0.0468
Women, Not Lactating or Pregnant	19<=Age<51 years		Bangladesh
				Full Pollination		224		0.9288		0.0429		0.21		224		1		0		NA		224		1		0		NA		224		0.479286		224		0.9218		0.046		0.33
				No Pollination				0.9713		0.031						1		0						1		0						0.538482				0.9485		0.0388
			Mozambique
				Full Pollination		115		0.4		0.113		0.03		115		0.99		0.021		0.41		115		Usual intake distribution could not be estimated.						115		Usual intake distribution could not be estimated.		115		0		0		0.38
				No Pollination				0.91		0.249						0.99		0.016						Usual intake distribution could not be estimated.								0.13				0.07		0.238
			Uganda
				Full Pollination		230		0.3135		0.113		0.01		230		0.9379		0.0534		0.43		230		0.3706		0.051		0.09		230		0.0811739		230		0.168		0.07		0.34
				No Pollination				0.5902		0.0421						0.9511		0.0511						0.4599		0.0418						0.093087				0.209		0.0717
			Zambia
				Full Pollination		161		0.2142		0.0683		0.04		161		0.9938		0.0122		0.475		161		0.53		0.0378		0.21		161		0.154783		161		0.3426		0.0435		0.27
				No Pollination				0.3729		0.0579						0.9949		0.0106						0.5739		0.0391						0.173727				0.3794		0.0422
Women, Lactating	19<=Age<51 years		Bangladesh
				Full Pollination		236		0.9954		0.00772		0.39		236		1		0		0.325		236		1		0		NA		236		0.434915		236		0.9792		0.0215		0.45
				No Pollination				0.9978		0.00402						0.9987		0.00289						1		0						0.486059				0.9829		0.0184
			Mozambique
				Full Pollination		267		0.91		0.066		0.08		267		Usual intake distribution could not be estimated.						267		0.95		0.104		0.385		267		0.14		267		0.27		0.048		0.285
				No Pollination				0.99		0.002						Usual intake distribution could not be estimated.								0.98		0.044						0.17				0.31		0.0444
			Uganda
				Full Pollination		221		0.6922		0.0778		0.235		221		0.9572		0.0798		0.465		221		0.7555		0.0748		0.23		221		0.0475566		221		0.1516		0.108		0.385
				No Pollination				0.7712		0.0748						0.9666		0.0738						0.8363		0.0804						0.0545701				0.1969		0.106
			Zambia
				Full Pollination		158		0.5072		0.0432		0.02		158		0.9822		0.0164		0.425		158		0.6707		0.0481		0.27		158		0.0663924		158		0.2596		0.0509		0.335
				No Pollination				0.6404		0.0481						0.9862		0.0138						0.7136		0.0517						0.0789241				0.2897		0.0496
										0.2245
Women, Pregnant	19<=Age<51 years		Bangladesh
				Full Pollination		0		-		-		-		0		-		-		-		0		-		-		-		0		-		0		-		-		-
				No Pollination
			Mozambique
				Full Pollination		56		Usual intake distribution could not be estimated.						56		1		0		NA		56		Usual intake distribution could not be estimated.						56		0.07		56		0.75		0.08		0.375
				No Pollination				Usual intake distribution could not be estimated.								1		0						1		0						0.12				0.79		0.08
			Uganda
				Full Pollination		62		0.5673		0.0858		0.335		62		0.8812		0.13		0.47		62		0.9591		0.0641		0.48		62		0.117581		62		0.9034		0.157		-
				No Pollination				0.6216		0.0955						0.8931		0.107						0.963		0.0502						0.143387				Usual intake distribution could not be estimated.
			Zambia
				Full Pollination		47		0.2465		0.0779		0.105		47		0.916		0.0532		0.495		47		0.8718		0.0629		0.43		47		0.163404		47		0.8333		0.0665		0.455
				No Pollination				0.3812		0.0711						0.9168		0.0527						0.8878		0.0612						0.244681				0.8439		0.0653
